# Supplementary material for: Tumor-Associated Macrophages Promote Epigenetic Silencing of Gelsolin through DNA Methyltransferase 1 in Gastric Cancer Cells
Source: Oxford University Press journal article supplement (doi:10.1158/2326-6066.cir-16-0295), 2017-08-23
Supplement: 23266066cir160295-sup-173764_2_supp_4212125_ttthxs.docx [file 23266066cir160295-sup-173764_2_supp_4212125_ttthxs.docx]

**SUPPLEMENTARY TABLES**

**Table S4. Expression of CD68 in 121 gastric tumors according to tumor stages**

|  | **CD68 staining** | | | | |
| --- | --- | --- | --- | --- | --- |
| **Patients** | **Grade 0** | **Grade 1** | **Grade 2** | **Grade 3a** |
| **N** | **N (%)** | **N (%)** | **N (%)** | **N (%)** |
| **Total** | 121 | 0 (0.00) | 16 (13.20) | 19 (15.70) | 86 (71.10) |
| **Earlyb** | 19 | 0 (0.00) | 3 (15.80) | 1 (5.30) | 15 (78.90) |
| **Advanced** | 102 | 0 (0.00) | 13 (12.70) | 18 (17.60) | 71 (69.60) |
| a Grade 0: 0~10%; Grade 1: 10~25%; Grade 2: 25~50%; Grade 3: >50%  b Early: stage Ia; Advanced: stage Ib, II, III, IV | | | | | |
